# Supplementary material for: Generation of bimodal porosity via self-extra porogenes in nanoporous carbons for supercapacitor application
Source: Royal Society of Chemistry journal article supplement (doi:10.1039/c4ta02565b), 2014-01-01
Supplement: c4ta02565b1.pdf [file c4ta02565b1.pdf]

## Supporting Information

### Generation of bimodal porosity via self-extra porogenes in nanoporous carbons for supercapacitor application

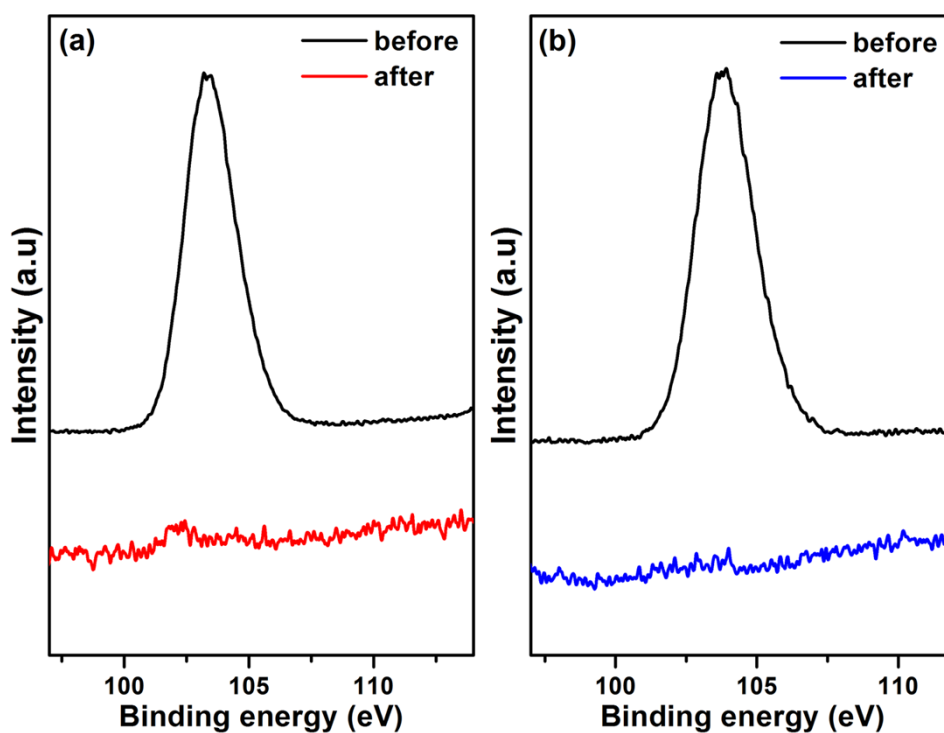

Fig. S1 XPS spectra of L-ZIF-8 (a) and F-ZIF-8 (b) before and after silica removal.

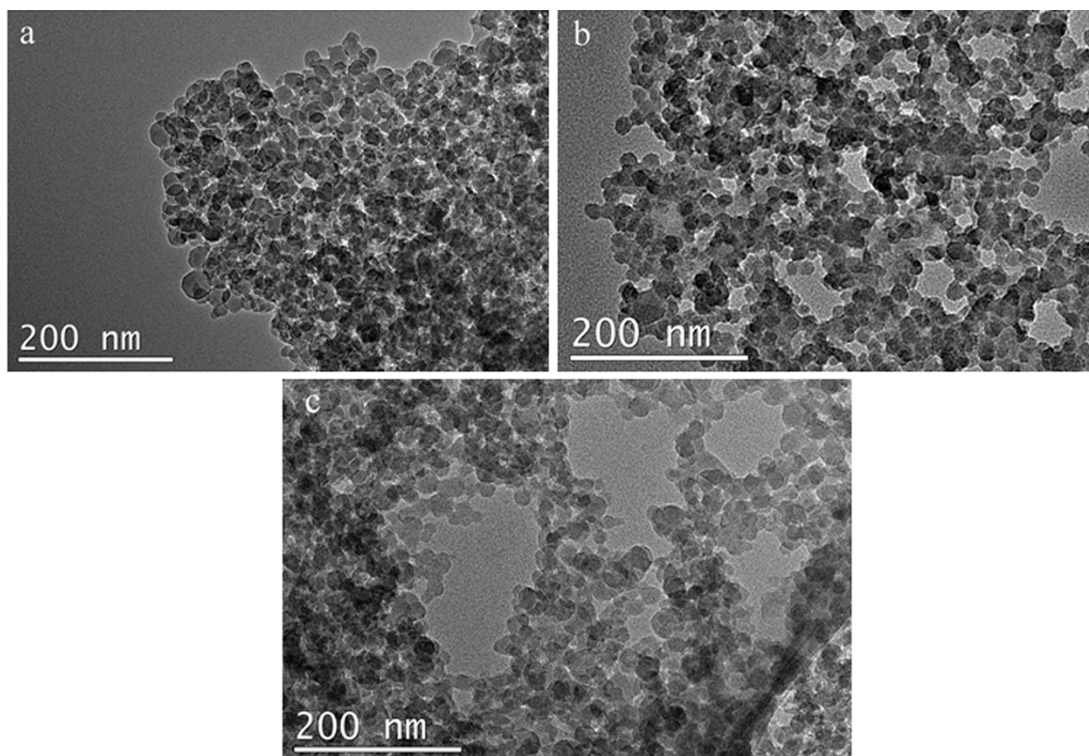

Fig. S2 TEM images of neat ZIF-8 (a), L-ZIF-8 (b) and F-ZIF-8 (c) samples at a low magnification.

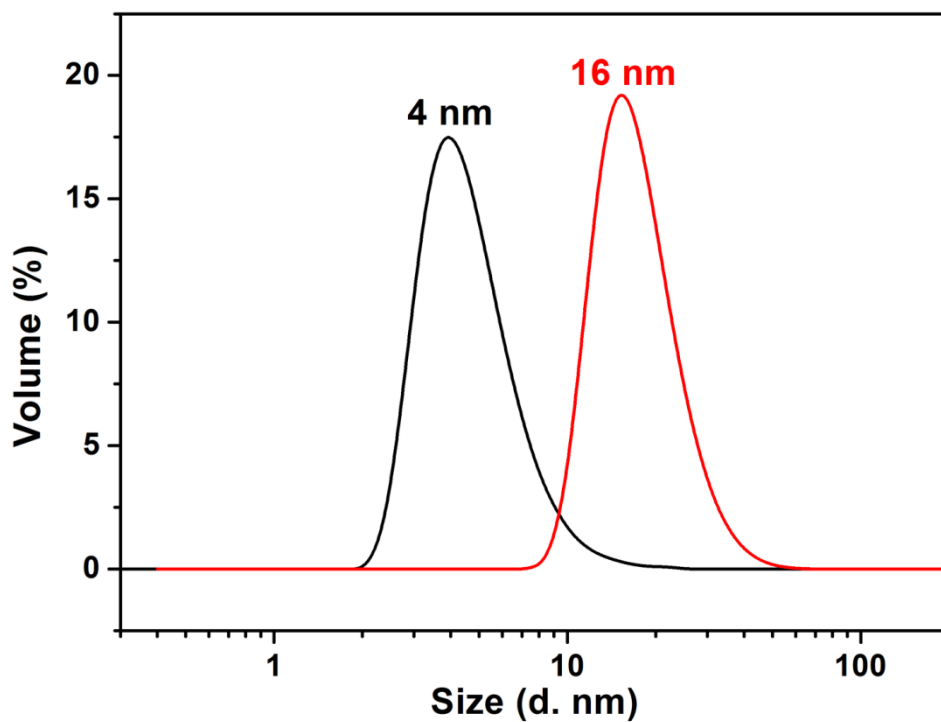

Fig. S3 DLS curves of silica suspensions of ludox (black) and fumed silica (red).

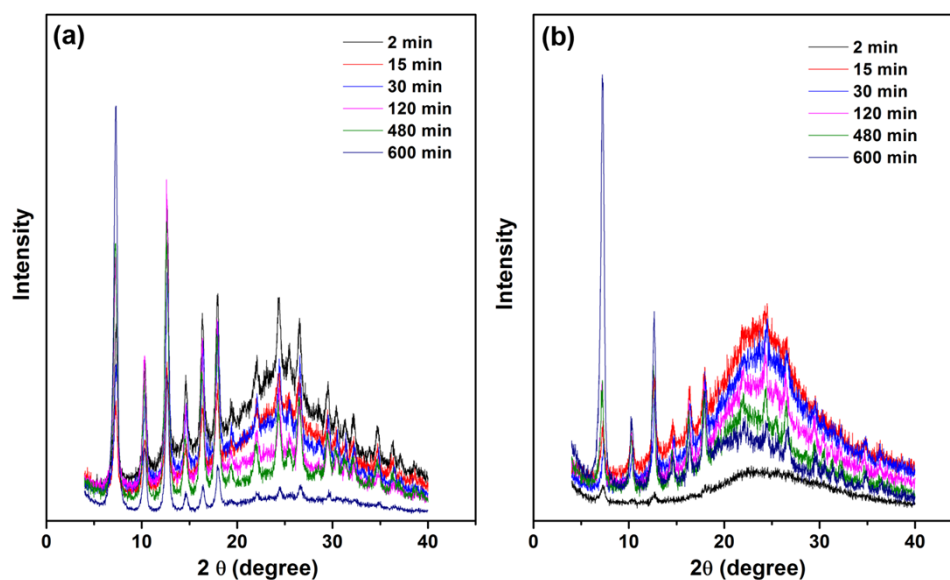

Fig. S4 Time-dependent XRD patterns of (a) neat ZIF-8, (b) L-ZIF-8.

Table S1 - Results from N<sub>2</sub>-sorption measurements for the obtained carbon materials.

| Sample   | $S_{\text{BET}}$<br>(m <sup>2</sup> g <sup>-1</sup> ) | $S_{\text{micro}}^{\text{[a]}}$<br>(m <sup>2</sup> g <sup>-1</sup> ) | $V_{\text{total}}^{\text{[b]}}$<br>(cm <sup>3</sup> g <sup>-1</sup> ) | $V_{\text{micro}}^{\text{[c]}}$<br>(cm <sup>3</sup> g <sup>-1</sup> ) | $V_{\text{meso}}^{\text{[d]}}$<br>(cm <sup>3</sup> g <sup>-1</sup> ) | $V_{\text{meso}}/V_{\text{total}}$ |
|----------|-------------------------------------------------------|----------------------------------------------------------------------|-----------------------------------------------------------------------|-----------------------------------------------------------------------|----------------------------------------------------------------------|------------------------------------|
| C-ZIF-8  | 745                                                   | 563                                                                  | 0.83                                                                  | 0.23                                                                  | 0.6                                                                  | 0.72                               |
| LC-ZIF-8 | 1026                                                  | 351                                                                  | 1.71                                                                  | 0.16                                                                  | 1.54                                                                 | 0.9                                |
| FC-ZIF-8 | 721                                                   | 342                                                                  | 1.68                                                                  | 0.15                                                                  | 1.5                                                                  | 0.89                               |

[a] micropore areas calculated using t-plot method.

[b] total pore volumes at  $P/P_0=0.99$ .

[c] micropore volumes calculated by t-plot method.

[d] mesopore volumes using BJH method.

Table S2 - Textural data, contents of graphitic phase and equivalent series resistance (ESR) for C-ZIF-8 carbons prepared at three carbonization temperatures.

| Sample        | $S_{\text{BET}}$<br>( $\text{m}^2 \text{g}^{-1}$ ) | $S_{\text{micro}}$<br>( $\text{m}^2 \text{g}^{-1}$ ) | Pore sizes<br>(nm) | Graphitic phase<br>(%) | ESR<br>( $\Omega \text{cm}^2$ ) |
|---------------|----------------------------------------------------|------------------------------------------------------|--------------------|------------------------|---------------------------------|
| C-ZIF-8(1073) | 745                                                | 536                                                  | 1.0, 8.0           | 25.0                   | 0.42                            |
| C-ZIF-8(1173) | 811                                                | 520                                                  | 1.1, 8.1           | 29.6                   | 0.30                            |
| C-ZIF-8(1273) | 877                                                | 506                                                  | 1.2, 8.3           | 34.2                   | 0.28                            |
